# Supplementary material
Source: MDPI journal article supplement (https://www.mdpi.com/2311-7524/9/7/821)
Supplement: s1 [file s1]

**Supplementary Table S1.** Correlation of physico-chemical parameters and transcription level of sulfate transporter genes of plants grown in 25 % hoagland media having 0.5 mM sulfate

|                                   | Biomass Whole Plant | Shoot/root ratio | Sulfate Uptake capacity of Plant | Sulfate content in shoot | Nitrate content in shoot | Thiols content in shoot | Free amino acids content in shoot | Sulfate content in root | Nitrate content in root | Thiols content in root | Free amino acids content in root | Sultr 1;1 Expression level | Sultr 1;2 Expression level |
|-----------------------------------|---------------------|------------------|----------------------------------|--------------------------|--------------------------|-------------------------|-----------------------------------|-------------------------|-------------------------|------------------------|----------------------------------|----------------------------|----------------------------|
| Biomass Whole Plant               | 1                   |                  |                                  |                          |                          |                         |                                   |                         |                         |                        |                                  |                            |                            |
| Shoot/root ratio                  | 0.957767            | 1                |                                  |                          |                          |                         |                                   |                         |                         |                        |                                  |                            |                            |
| Sulfate Uptake capacity of Plant  | 0.655757            | 0.792394         | 1                                |                          |                          |                         |                                   |                         |                         |                        |                                  |                            |                            |
| Sulfate content in shoot          | 0.994866            | 0.9401           | 0.671931                         | 1                        |                          |                         |                                   |                         |                         |                        |                                  |                            |                            |
| Nitrate content in shoot          | 0.997832            | 0.936769         | 0.616839                         | 0.995647                 | 1                        |                         |                                   |                         |                         |                        |                                  |                            |                            |
| Thiols content in shoot           | 0.476331            | 0.211929         | -0.28498                         | 0.490933                 | 0.531152                 | 1                       |                                   |                         |                         |                        |                                  |                            |                            |
| Free amino acids content in shoot | 0.832833            | 0.897976         | 0.957519                         | 0.852184                 | 0.808166                 | 0.002916                | 1                                 |                         |                         |                        |                                  |                            |                            |
| Sulfate content in root           | 0.997632            | 0.974457         | 0.701547                         | 0.991368                 | 0.991135                 | 0.41475                 | 0.86228                           | 1                       |                         |                        |                                  |                            |                            |
| Nitrate content in root           | 0.779393            | 0.771763         | 0.255319                         | 0.715058                 | 0.771777                 | 0.437145                | 0.413199                          | 0.771195                | 1                       |                        |                                  |                            |                            |
| Thiols content in root            | 0.800416            | 0.896294         | 0.977431                         | 0.812235                 | 0.769092                 | 0.09139                 | 0.993652                          | 0.83599                 | 0.418537                | 1                      |                                  |                            |                            |
| Free amino acids content in root  | 0.330216            | 0.516718         | 0.928889                         | 0.35551                  | 0.283771                 | 0.57917                 | 0.791703                          | 0.387861                | 0.07611                 | 0.830008               | 1                                |                            |                            |
| Sultr 1;1 Expression level        | 0.69582             | 0.7003           | -0.17408                         | 0.62257                  | 0.6864                   | 0.39197                 | -0.31612                          | 0.68806                 | 0.99218                 | 0.33029                | 0.139016                         | 1                          |                            |
| Sultr 1;2 Expression level        | 0.987237            | 0.899991         | 0.548754                         | 0.987697                 | 0.995517                 | 0.608552                | 0.75988                           | 0.974132                | 0.765702                | 0.712272               | 0.205122                         | 0.679918756                | 1                          |
