# Supplementary material
Source: MDPI journal article supplement (https://www.mdpi.com/2311-7524/9/7/821)
Supplement: s1 [file s1]

**Supplementary Table S4.** Correlation of physico-chemical parameters and transcription level of sulfate transporter genes of plants grown in 25 % hoagland media in absence of sulfate and further treated with different concentrations of H<sub>2</sub>S for 6 days

|                                   | Biomass production in whole plant | Shoot/root ratio | Sulfate Uptake capacity of plant | DMC content in shoot | Chlorophyll content in shoot | Sulfate content in shoot | Nitrate content in shoot | Thiols content in shoot | Free amino acids | DMC content in root | Sulfate content in root | Nitrate content in root | Thiols content in root | Free amino acids content in root | Sulfate 1;1 Expression | Sulfate 1;2 Expression |
|-----------------------------------|-----------------------------------|------------------|----------------------------------|----------------------|------------------------------|--------------------------|--------------------------|-------------------------|------------------|---------------------|-------------------------|-------------------------|------------------------|----------------------------------|------------------------|------------------------|
| Biomass production in whole plant | 1                                 |                  |                                  |                      |                              |                          |                          |                         |                  |                     |                         |                         |                        |                                  |                        |                        |
| Shoot/root ratio                  | 0.919236                          | 1                |                                  |                      |                              |                          |                          |                         |                  |                     |                         |                         |                        |                                  |                        |                        |
| Sulfate Uptake capacity of plant  | -0.8782                           | -0.9812          | 1                                |                      |                              |                          |                          |                         |                  |                     |                         |                         |                        |                                  |                        |                        |
| DMC content in shoot              | -0.92696                          | -0.7376          | 0.729484                         | 1                    |                              |                          |                          |                         |                  |                     |                         |                         |                        |                                  |                        |                        |
| Chlorophyll content in shoot      | 0.778689                          | 0.837218         | -0.92046                         | -0.76202             | 1                            |                          |                          |                         |                  |                     |                         |                         |                        |                                  |                        |                        |
| Sulfate content in shoot          | 0.948468                          | 0.996236         | -0.97701                         | -0.79336             | 0.849584                     | 1                        |                          |                         |                  |                     |                         |                         |                        |                                  |                        |                        |
| Nitrate content in shoot          | -0.85255                          | -0.96173         | 0.996553                         | 0.721197             | -0.94652                     | -0.95798                 | 1                        |                         |                  |                     |                         |                         |                        |                                  |                        |                        |
| Thiols content in shoot           | 0.999338                          | 0.931614         | -0.88936                         | -0.91312             | 0.779965                     | 0.957878                 | 0.86288                  | 1                       |                  |                     |                         |                         |                        |                                  |                        |                        |
| Free amino acids                  | -0.92717                          | -0.98124         | 0.992298                         | 0.807528             | -0.92236                     | -0.98738                 | 0.986229                 | -0.93457                | 1                |                     |                         |                         |                        |                                  |                        |                        |
| DMC content in root               | -0.14152                          | 0.044151         | -0.23391                         | 0.049408             | 0.510104                     | 0.027618                 | -0.31154                 | -0.14042                | -0.17479         | 1                   |                         |                         |                        |                                  |                        |                        |
| Sulfate content in root           | -0.19388                          | 0.19245          | -0.29614                         | 0.387657             | 0.290021                     | 0.120386                 | -0.3327                  | -0.16692                | 0.17875          | 0.688247            | 1                       |                         |                        |                                  |                        |                        |
| Nitrate content in root           | 0.098322                          | 0.083872         | -0.26196                         | -0.33226             | 0.615123                     | 0.112801                 | -0.33711                 | 0.082448                | 0.26671          | 0.85985             | 0.239697                | 1                       |                        |                                  |                        |                        |
| Thiols content in root            | 0.685763                          | 0.60246          | -0.70409                         | -0.8283              | 0.907909                     | 0.646058                 | 0.74242                  | 0.671858                | 0.7444           | 0.512989            | 5.33E-16                | 0.789352                | 1                      |                                  |                        |                        |

|                                  |          |          |          |          |          |          |          |          |          |          |          |          |           |          |          |   |
|----------------------------------|----------|----------|----------|----------|----------|----------|----------|----------|----------|----------|----------|----------|-----------|----------|----------|---|
| root                             |          | 4        |          |          |          |          |          |          | 34       |          |          |          |           |          |          |   |
| Free amino acids content in root | -0.58147 | -0.40829 | 0.231637 | 0.454514 | 0.054633 | -0.43162 | 0.154805 | -0.58198 | 0.298131 | 0.886294 | 0.620716 | 0.68154  | 0.120152  | 1        |          |   |
| Sultr1;1 Expression              | 0.96276  | 0.97815  | 0.925902 | 0.792652 | 0.75115  | 0.98462  | 0.893483 | 0.97193  | 0.946329 | 0.147429 | -1E-16   | 0.039464 | 0.54866   | 0.581826 | 1        |   |
| Sultr1;2 Expression              | 0.98933  | 0.96034  | 0.91358  | 0.863562 | 0.77356  | 0.97752  | 0.884322 | 0.99397  | 0.9475   | 0.142253 | 0.088581 | -0.02831 | -0.062063 | 0.584029 | 0.991864 | 1 |
