# Supplementary material
Source: MDPI journal article supplement (https://www.mdpi.com/2311-7524/9/7/821)
Supplement: s1 [file s1]

**Supplementary Table S3.** Correlation of physico-chemical parameters and transcription level of sulfate transporter genes of plants grown in 25 % hoagland media and 0.5 mM sulfate and further treated with different concentrations of H<sub>2</sub>S for 6 days

|                                   | Biomass production in whole plant | Shoot/root ratio | Sulfate Uptake capacity of plant | DMC content in shoot | Chlorophyll content in shoot | Sulfate content in shoot | Nitrate content in shoot | Thiols content in shoot | Free amino acids | DMC content in root | Sulfate content in root | Nitrate content in root | Thiols content in root | Free amino acids content in root | Sulfate 1;1 Expression | Sulfate 1;2 Expression |
|-----------------------------------|-----------------------------------|------------------|----------------------------------|----------------------|------------------------------|--------------------------|--------------------------|-------------------------|------------------|---------------------|-------------------------|-------------------------|------------------------|----------------------------------|------------------------|------------------------|
| Biomass production in whole plant | 1                                 |                  |                                  |                      |                              |                          |                          |                         |                  |                     |                         |                         |                        |                                  |                        |                        |
| Shoot/root ratio                  | 0.48537                           | 1                |                                  |                      |                              |                          |                          |                         |                  |                     |                         |                         |                        |                                  |                        |                        |
| Sulfate Uptake capacity of plant  | 0.7787                            | 0.01325          | 1                                |                      |                              |                          |                          |                         |                  |                     |                         |                         |                        |                                  |                        |                        |
| DMC content in shoot              | 0.808906                          | 0.161            | 0.97922                          | 1                    |                              |                          |                          |                         |                  |                     |                         |                         |                        |                                  |                        |                        |
| Chlorophyll content in shoot      | 0.41095                           | 0.051504         | 0.863378                         | 0.76089              | 1                            |                          |                          |                         |                  |                     |                         |                         |                        |                                  |                        |                        |
| Sulfate content in shoot          | 0.89462                           | 0.04439          | 0.883242                         | 0.82629              | 0.720163                     | 1                        |                          |                         |                  |                     |                         |                         |                        |                                  |                        |                        |
| Nitrate content in shoot          | 0.241235                          | 0.468848         | 0.79641                          | 0.741028             | 0.93043                      | 0.49403                  | 1                        |                         |                  |                     |                         |                         |                        |                                  |                        |                        |
| Thiols content in shoot           | 0.516285                          | 0.31701          | 0.74319                          | 0.84533              | 0.49477                      | 0.40298                  | 0.672388                 | 1                       |                  |                     |                         |                         |                        |                                  |                        |                        |
| Free amino acids                  | 0.875662                          | 0.42074          | 0.4717                           | 0.45611              | 0.16873                      | 0.79973                  | 0.12443                  | 0.039787                | 1                |                     |                         |                         |                        |                                  |                        |                        |
| DMC content in root               | 0.77037                           | 0.530159         | 0.789093                         | 0.89715              | 0.417852                     | 0.591549                 | 0.49567                  | 0.9334                  | 0.37815          | 1                   |                         |                         |                        |                                  |                        |                        |
| Sulfate content in root           | 0.93518                           | 0.199425         | 0.947204                         | 0.93945              | 0.703712                     | 0.960489                 | 0.56229                  | 0.63283                 | 0.72289          | 0.791915            | 1                       |                         |                        |                                  |                        |                        |
| Nitrate content in root           | 0.87896                           | 0.1855           | 0.983453                         | 0.97309              | 0.778886                     | 0.933843                 | 0.67378                  | 0.70151                 | 0.61602          | 0.811139            | 0.989366                | 1                       |                        |                                  |                        |                        |
| Thiols content in root            | 0.83201                           | 0.26120          | 0.954068                         | 0.99456              | 0.689479                     | 0.801504                 | 0.68221                  | 0.86948                 | 0.473            | 0.93633             | 0.932548                | 0.959324                | 1                      |                                  |                        |                        |

|                                  |          |          |          |          |          |          |         |         |          |          |          |          |          |          |   |   |
|----------------------------------|----------|----------|----------|----------|----------|----------|---------|---------|----------|----------|----------|----------|----------|----------|---|---|
| root                             |          | 9        |          |          |          |          |         |         | 3        |          |          |          |          |          |   |   |
| Free amino acids content in root | -0.83997 | 0.416976 | 0.887933 | -0.96146 | 0.555733 | 0.730797 | 0.57632 | 0.89727 | -0.47348 | 0.981035 | 0.891902 | 0.909118 | 0.9848   | 1        |   |   |
| Sultr1;1 Expression              | 0        | 0        | 0        | 0        | 0        | 0        | 0       | 0       | 0        | 0        | 0        | 0        | 0        | 0        | 1 |   |
| Sultr1;2 Expression              | -0.53512 | 0.966988 | -0.05232 | -0.09091 | -0.53954 | 0.125196 | 0.58392 | 0.13005 | -0.582   | 0.407795 | 0.215861 | 0.107269 | 0.184177 | 0.325987 | 0 | 1 |
