# Supplementary material
Source: MDPI journal article supplement (https://www.mdpi.com/2311-7524/9/7/821)
Supplement: s1 [file s1]

**Supplementary Table S2.** Correlation of physico-chemical parameters and transcription level of sulfate transporter genes of plants grown in 25 % hoagland media having 0 mM sulfate

|                                   | Biomass Whole Plant | Shoot/root ratio | Sulfate Uptake capacity of Plant | Sulfate content in shoot | Nitrate content in shoot | Thiols content in shoot | Free amino acids content in shoot | Sulfate content in root | Nitrate content in root | Thiols content in root | Free amino acids content in root | Sultr 1;1 Expression level | Sultr 1;2 Expression level |
|-----------------------------------|---------------------|------------------|----------------------------------|--------------------------|--------------------------|-------------------------|-----------------------------------|-------------------------|-------------------------|------------------------|----------------------------------|----------------------------|----------------------------|
| Biomass Whole Plant               | 1                   |                  |                                  |                          |                          |                         |                                   |                         |                         |                        |                                  |                            |                            |
| Shoot/root ratio                  | 0.978488            | 1                |                                  |                          |                          |                         |                                   |                         |                         |                        |                                  |                            |                            |
| Sulfate Uptake capacity of Plant  | 0.961983            | 0.991439         | 1                                |                          |                          |                         |                                   |                         |                         |                        |                                  |                            |                            |
| Sulfate content in shoot          | 0.94266             | 0.99105          | -0.98467                         | 1                        |                          |                         |                                   |                         |                         |                        |                                  |                            |                            |
| Nitrate content in shoot          | 0.987554            | 0.99863          | 0.986365                         | 0.98341                  | 1                        |                         |                                   |                         |                         |                        |                                  |                            |                            |
| Thiols content in shoot           | 0.94602             | 0.92096          | -0.94475                         | 0.87622                  | 0.92618                  | 1                       |                                   |                         |                         |                        |                                  |                            |                            |
| Free amino acids content in shoot | 0.927718            | 0.909211         | 0.940618                         | 0.86769                  | 0.91209                  | 0.99814                 | 1                                 |                         |                         |                        |                                  |                            |                            |
| Sulfate content in root           | 0.96989             | 0.99878          | -0.98741                         | 0.995381                 | 0.99607                  | 0.901038                | -0.88879                          | 1                       |                         |                        |                                  |                            |                            |
| Nitrate content in root           | 0.821892            | 0.921641         | 0.931784                         | 0.96368                  | 0.900529                 | 0.77171                 | 0.774789                          | 0.93366                 | 1                       |                        |                                  |                            |                            |
| Thiols content in root            | 0.44496             | 0.40251          | -0.49901                         | 0.344744                 | 0.40222                  | 0.709485                | -0.74058                          | 0.36318                 | 0.29462                 | 1                      |                                  |                            |                            |
| Free amino acids content in root  | 0.976511            | 0.986547         | 0.995163                         | 0.96681                  | 0.985789                 | 0.97022                 | 0.964543                          | 0.97815                 | 0.891668                | 0.54644                | 1                                |                            |                            |
| Sultr 1;1 Expression level        | 0.962873            | 0.945169         | 0.96337                          | 0.90589                  | 0.949432                 | 0.99771                 | 0.993981                          | 0.92824                 | 0.805678                | 0.66366                | 0.984024                         | 1                          |                            |
| Sultr 1;2 Expression level        | 0.81179             | 0.912074         | 0.904301                         | 0.95825                  | 0.892817                 | 0.71501                 | 0.711045                          | 0.92918                 | 0.989332                | 0.16147                | 0.859562                         | 0.756695092                | 1                          |
